# Supplementary material
Source: publisher figshare collection journal article supplement (https://gsapubs.figshare.com/ndownloader/files/36515334)
Supplement: Supplementary file 1 [file 36515334]

## Sheet: C and O isotopes 
Sample number	Subsample	δ13C (‰; VPDB)	δ18O (‰; VPDB)
Calcite spar
20.67	A	-12.5501	-6.80129
20.67	B	-13.2945	-6.81855
20.67	C	-13.0541	-6.55636
20.67	D	-12.9471	-6.96628
25.74	A	-14.5036	-6.02436
25.74	B	-14.9277	-6.14375
33.12	A	-15.9165	-7.09653
33.12	B	-18.0134	-8.20984
33.12	C	-17.3245	-6.55222
33.73	A	-16.514	-8.66743
33.73	B	-14.8859	-7.36972
39.72	A	-15.7266	-5.72021
39.72	B	-19.2305	-5.31471
39.72	C	-17.8857	-5.66251
40.32	A	-15.0263	-6.9039
40.32	B	-16.9988	-6.74965
51.06	A	-13.3732	-6.1369
51.06	B	-16.2187	-6.55359
51.06	C	-19.9333	-5.80396
51.06	D	-19.2438	-6.81615
51.06	E	-20.0556	-5.8059
51.22	A	-6.689	-6.16512
51.22	B	-11.9541	-5.96414
51.22	C	-19.6835	-5.8997
52.47	A	-12.0858	-5.66205
52.47	B	-17.3436	-7.29579
54.46	A	-5.30438	-5.90679
54.46	B	-8.16042	-5.3194
40.22	C	-16.1793	-6.07515
27.31	B	-18.3205	-6.7656
32.65	A	-15.7453	-7.74453
Host rock
32.65	B	5.50099	-2.42766
32.65	C	5.33429	-2.32534
35.91	A	-1.92681	-7.60871
35.91	B	-2.07005	-6.99167
35.91	C	-1.5312	-6.9961
27.31	A	4.88829	-4.35194
32.65	B	5.50099	-2.42766
32.65	C	5.33429	-2.32534
40.22	A	4.49988	-0.982137
40.22	B	5.02361	-2.17524
40.22	C	5.31604	-0.98945
102.94	-	0.923528	2.75958
84.20	-	1.95532	-5.88706
19.61	-	1.04549	-4.35184
52.35	-	-2.51385	-2.35378
69.46	-	0.021518	-6.69894
68.94	-	2.41329	-6.58133
90.70	-	2.24113	-6.62321

## Sheet: Clumped isotope data
Analyses date	Type	Sample ID	spec #'s	d13C_ VPDB	d13C_ stdev	d18O_ brand	d18O_ stdev	d18O_ mineral VSMOW	d18O_ mineral VPDB	d47	d47_ stdev	D47 (v. Oz)	D47_ sterr	d48	d48_ stdev	D48	D48_ stdev	D47_ ARF_ acid	D47_ ARF std error	T(C)	T_error (1 sd)	d18O _fluid
2022-01-25	sample	20.67A	142	-12.2917	0.0034652	32.3016	0.0034165	23.5594	-7.08203	-1.53846	0.0499896	-0.331606	0.0177007	23.3198	0.344678	8.90655	0.340857	0.65954	0.02188	36.07	4.376	-2.59844
2022-01-25	sample	20.67B	150	-13.0557	0.0041065	32.3356	0.0047664	23.5931	-7.0494	-2.29057	0.0355765	-0.371286	0.0123073	23.2261	0.241401	8.75114	0.24073	0.62705	0.01634	48.12	3.268	-0.381908
2022-01-25	sample	20.67C	158	-12.9037	0.0057902	32.3443	0.0073371	23.6017	-7.04099	-2.12619	0.0384192	-0.363841	0.0139261	23.3839	0.360465	8.88898	0.360106	0.63275	0.01795	45.91	3.59	-0.761946
2022-01-26	sample	20.67D	174	-12.7264	0.0028381	32.5995	0.0051444	23.8547	-6.79557	-1.71117	0.0557958	-0.373062	0.0197857	23.9527	0.474388	8.95066	0.46757	0.61527	0.024	52.85	4.8	0.688129
2022-01-26	sample	33.12A	182	-15.6993	0.0025628	31.8457	0.0024794	23.1074	-7.52054	-5.41961	0.0544968	-0.438997	0.0192278	21.3378	0.190212	7.85599	0.1846	0.60269	0.02349	58.14	4.698	0.841183
2022-01-26	sample	33.12B	199	-18.0974	0.0066286	31.9204	0.0040363	23.1814	-7.44874	-7.66613	0.0238558	-0.418478	0.0082821	22.0067	0.310915	8.38054	0.306841	0.66388	0.01309	34.56	2.618	-3.25205
2022-01-26	sample	33.12C	207	-17.5469	0.0056612	31.8059	0.0040687	23.0679	-7.55887	-7.23178	0.0436578	-0.409044	0.016914	21.7367	0.413331	8.33527	0.407955	0.6673	0.02127	33.39	4.254	-3.5855
2022-01-27	sample	39.72A	223	-15.3004	0.0040652	33.0087	0.0058513	24.2605	-6.40194	-3.84352	0.0093507	-0.393734	0.0036364	25.2696	0.254502	9.45969	0.252669	0.62766	0.00947	47.88	1.894	0.227935
2022-01-27	sample	39.72B	231	-18.588	0.0041698	33.8081	0.0056238	25.0531	-5.63306	-6.29965	0.0471034	-0.420657	0.0166116	28.0615	0.291581	10.6593	0.28944	0.63839	0.02085	43.76	4.17	0.271331
2022-01-27	sample	39.72C	248	-17.3207	0.0048852	32.6588	0.0046551	23.9136	-6.73846	-6.12741	0.0507944	-0.360911	0.0191137	24.1344	0.415649	9.03326	0.405026	0.70348	0.0236	21.74	4.72	-5.07637
2022-01-27	sample	51.06A	256	-12.9659	0.0026383	33.2498	0.0062392	24.4995	-6.17008	-1.28282	0.0236984	-0.350773	0.007614	26.2123	0.452055	9.90701	0.442372	0.63342	0.01206	45.65	2.412	0.0683766
2022-01-28	sample	51.06B	322	-16.1782	0.0039267	32.0556	0.002869	23.3154	-7.31871	-5.66747	0.0312707	-0.42525	0.0117436	22.0935	0.186054	8.19411	0.185212	0.62251	0.01592	49.92	3.184	-0.340494
2022-01-29	sample	51.06C	338	-19.5966	0.0060898	32.6433	0.0039985	23.8982	-6.7534	-8.45059	0.0506605	-0.446927	0.0188699	24.2963	0.447071	9.23275	0.441574	0.64472	0.02331	41.4	4.662	-1.28206
2022-01-28	sample	51.06D	288	-19.0649	0.0031207	31.9839	0.0053199	23.2443	-7.38768	-8.61803	0.0369719	-0.488858	0.0127287	22.0837	0.284546	8.33663	0.282939	0.59982	0.01701	59.39	3.402	1.17996
2022-01-28	sample	51.06E	306	-20.0146	0.0042877	33.1666	0.0070669	24.4171	-6.25004	-8.37203	0.0430664	-0.471866	0.0150894	25.9272	0.473933	9.81868	0.458389	0.61502	0.01936	52.96	3.872	1.25645
2022-01-28	sample	51.22A	314	-8.18756	0.0019789	32.2359	0.0048004	23.4943	-7.14523	2.44615	0.0344222	-0.288971	0.0109579	22.6287	0.2902	8.33595	0.286085	0.64095	0.01501	42.8	3.002	-1.42245
2022-01-27	sample	51.22B	264	-12.3884	0.0023277	33.1611	0.0046647	24.4116	-6.25538	-0.806331	0.0549973	-0.351299	0.0195544	25.8979	0.185502	9.76832	0.182527	0.6248	0.02376	49.01	4.752	0.572563
2022-01-28	sample	51.22C	280	-19.2733	0.0047853	32.5155	0.0050333	23.7715	-6.87632	-8.24946	0.027621	-0.436457	0.0091712	23.7497	0.202185	8.94235	0.19669	0.65325	0.01384	38.3	2.768	-1.97523
2022-01-29	sample	54.46A	346	-5.18932	0.0026942	33.2874	0.0035893	24.5368	-6.1339	6.43009	0.0321377	-0.274698	0.0115004	26.0784	0.544189	9.66881	0.536529	0.59009	0.01545	63.71	3.09	3.14182
2022-01-29	sample	54.46B	354	-7.87076	0.0031409	33.4193	0.0060703	24.6676	-6.00703	3.88753	0.0538548	-0.326963	0.0176638	26.794	0.422823	10.1266	0.414853	0.57344	0.02166	71.52	4.332	4.48739

## Sheet: U Pb analyses
		Session date	238U (mV)	232Th (mV)	207Pb (cps)	206Pb (cps)	204Pb (cps)		238U/206Pb	238U/206Pb internal uncertainty	207Pb/206Pb	207Pb/206Pb internal uncertainty	rho
Calcite Spar	Sample 27.31 Area 1	2021-09-13	1.2553	-0.000100023	19.934	507.093	-408.048		216.622	10.5606	0.0336441	0.0171275	-0.0409943
		2021-09-13	6.32511	-0.00945782	110.458	1062.79	-325.375		515.906	17.0263	0.0942171	0.0104603	-0.292556
		2021-09-13	4.41321	-0.0243482	60.6272	1395.4	-390.9		270.413	8.15832	0.0399143	0.00596634	0.0431651
		2021-09-13	2.19348	-0.0180646	14.0941	378.315	-400.153		504.162	22.715	0.0313499	0.0218955	0.011829
		2021-09-13	3.14436	-0.0284744	38.5204	602.488	-358.449		451.57	16.8643	0.0602627	0.01274	0.0957492
		2021-09-13	2.70261	0.00304069	38.2206	863.17	-330.608		268.058	9.56377	0.0411632	0.010501	0.00759856
		2021-09-13	2.75431	-0.00700829	24.2713	788.961	-789.103		304.445	11.4602	0.0260362	0.00946523	0.0713786
		2021-09-13	1.00847	-0.0027862	16.5725	221.13	-326.095		415.641	27.9278	0.076888	0.0382223	-0.0175138
		2021-09-13	5.32722	-0.00646558	761.152	1661.31	-215.457		282.157	14.0434	0.427759	0.0219137	-0.706358
		2021-09-13	2.62428	-0.00635743	258.218	714.625	-311.756		324.226	14.0536	0.32598	0.0190267	-0.0744071
		2021-09-13	4.98305	-0.00404714	80.5492	1763.69	-430.461		241.765	7.07196	0.0414756	0.00442154	0.10695
		2021-09-13	4.41209	0.0124096	73.3281	1724.72	-364.035		218.07	6.33111	0.0383389	0.00523774	0.0694993
		2021-09-13	2.37351	0.00538779	102.897	657.01	-932.618		301.107	15.8338	0.149485	0.0158035	-0.0772011
		2021-09-13	3.63673	0.0103988	54.2387	1210.95	-299.335		257.007	8.12583	0.0407995	0.00700826	0.0399935
		2021-09-13	1.7517	0.00716898	47.8074	621.829	-402.567		243.712	9.81471	0.0753505	0.0142235	-0.0515696
		2021-09-13	3.6465	0.00632694	149.436	1452.23	-365.187		214.877	6.68922	0.0899268	0.00755202	-0.054541
		2021-09-13	8.5623	-0.00728722	706.323	1717.41	-211.215		515.362	38.1357	0.320219	0.0266187	-0.809563
		2021-09-13	5.67613	-0.000301133	81.6672	952.357	-412.938		510.881	16.1939	0.0790113	0.0108597	0.0569359
		2021-09-13	22.2753	0.133461	704.456	13787.1	-546.409		136.748	3.64171	0.0444597	0.00124521	-0.476451
		2021-09-13	10.9086	0.00695341	298.739	5555.68	-226.263		166.835	4.43158	0.0489991	0.00267957	-0.504115
		2021-09-13	19.1571	0.0578958	510.085	7078.3	-295.409		230.83	6.28765	0.0636066	0.00433548	-0.615093
		2021-09-13	12.046	0.0475388	245.615	4480.77	-265.557		225.749	6.2016	0.0521333	0.00306375	-0.413114
		2021-09-13	24.6823	0.0539784	427.144	9284.21	-261.013		226.254	5.87599	0.0425186	0.00135267	0.142284
		2021-09-13	12.408	0.0578522	253.748	5176	-368.287		202.376	5.66116	0.0455028	0.00221048	-0.00525494
		2021-09-13	5.60732	0.0483092	49.6521	1648.82	-743.788		290.629	8.44223	0.0260931	0.00521942	-0.0735651
		2021-09-13	17.4878	0.00521185	337.998	6458.92	-462.471		229.771	6.03332	0.0490981	0.00215714	0.0893544
		2021-09-13	7.53856	0.0112182	331.55	3070.83	-235.591		209.412	5.94299	0.100365	0.00616611	-0.453395
		2021-10-22	4.63202	0.000565054	914.65	2171.18	-3.87455		185.684	7.88066	0.338725	0.0172098	-0.372648
		2021-10-22	4.79957	0.00639892	216.894	1643.7	-1.07289		243.103	7.8097	0.104796	0.0113263	-0.497319
		2021-10-22	2.09909	0.000951691	109.425	430.322	-3.30198		418.457	23.9896	0.169494	0.0362466	-0.282922
		2021-10-22	13.4896	0.0126315	298.667	4774.6	-0.959324		239.062	7.85562	0.0554027	0.00449186	-0.0771908
		2021-10-22	50.5806	0.0153106	951.025	18127.2	-1.79639		227.542	5.87211	0.0465597	0.00108069	-0.181713
		2021-10-22	11.2982	-0.000697888	214.172	3717.16	-5.98042		252.37	7.07192	0.0496932	0.00361278	-0.4229
		2021-10-22	1.3623	-0.00989635	114.964	552.332	-2.04933		210.345	12.7479	0.140318	0.0277023	-0.0993556
		2021-10-22	2.76609	0.00209215	76.0694	740.209	-3.95625		309.187	12.0952	0.0868898	0.0143507	0.0549763
		2021-10-22	14.0795	0.006609	561.606	2808.99	-2.42751		425.592	15.6027	0.152125	0.0181243	-0.84774
		2021-10-22	26.5098	-0.000883941	968.101	8599.05	-3.12519		252.054	6.88206	0.101135	0.00402007	-0.555432
		2021-10-22	10.4352	0.0050888	148.495	2838.91	-1.12009		301.27	8.39115	0.0456075	0.00336116	-0.27232
		2021-10-22	5.41497	0.0107649	325.141	1777.69	-6.89888		253.872	8.28626	0.154178	0.0107066	-0.670256
		2021-10-22	3.85079	0.00941461	227.829	1097.38	-2.95611		296.224	10.8732	0.166598	0.014008	-0.380337
		2021-10-22	4.22055	0.0155582	10050.4	11353.9	-0.203962		128.906	17.3645	0.594182	0.0344653	-0.946478
		2021-10-22	2.86716	0.14524	110591	116505	35.0188		30.1282	4.70271	0.800098	0.0117007	-0.709873
		2021-10-22	3.04709	0.078456	67960.2	72229.1	14.9962		42.5844	4.4277	0.731989	0.0148247	-0.832361
		2021-10-22	9.84416	0.0167194	908.974	3300.3	-3.51439		242.704	6.99749	0.241203	0.0123781	-0.381559
		2021-10-22	5.30071	-0.00813165	720.915	2673.64	-6.45274		167.608	5.39098	0.223623	0.0118949	-0.478396
		2021-10-22	3.80634	-0.000232255	713.246	1444.93	-7.7685		212.757	15.114	0.465466	0.0227672	-0.528481
		2021-10-22	3.92905	-0.000956246	864.42	1468.19	-3.22096		234.637	10.6903	0.509459	0.0170539	-0.441689
		2021-10-22	11.9853	0.00564948	780.634	3930.42	-6.23886		250.657	8.77362	0.172735	0.00937405	-0.753039
		2021-10-22	6.06325	0.0184736	486.711	1523.59	-5.93132		330.411	12.254	0.275534	0.0188838	-0.602213
		2021-10-22	7.02111	-0.00444855	1881.94	3935.27	-0.248404		160.458	7.61201	0.389728	0.0182747	-0.878472
		2021-10-22	3.02035	0.00796621	222.366	794.672	-4.32989		319.972	12.283	0.24247	0.0141115	-0.171993
		2021-10-22	3.59978	0.0057081	187.567	1508.26	-1.05224		193.317	5.85435	0.110468	0.00891761	-0.160124
	Sample 27.31 Area 2	2021-09-13	6.765	0.499913	371.068	2393.75	-331.268		266.426	13.7961	0.142797	0.00642427	-0.0644639
		2021-09-13	7.97039	0.0377673	102.036	1951.95	-418.303		354.389	10.9815	0.0494792	0.00488837	0.19953
		2021-09-13	2.94742	-0.0270733	1575.52	2768.43	-173.323		87.7533	4.09859	0.536865	0.0140429	-0.542167
		2021-09-13	1.40929	-0.00524568	706.908	1213.62	-198.931		99.2158	4.40634	0.54291	0.015494	0.117638
		2021-09-13	7.81454	1.02907	151.608	1241.27	-575.309		541.315	16.1365	0.114096	0.00886881	0.108555
		2021-09-13	40.1018	1.26169	1255.03	22301.8	-513.954		154.255	3.99606	0.0542951	0.00168616	0.543112
		2021-09-13	7.10559	0.135563	196.936	3598.19	-215.091		168.911	4.87134	0.0506389	0.00300681	-0.225831
		2021-09-13	18.174	0.549362	2318.25	13924.6	-227.212		107.013	3.14861	0.176037	0.00682371	-0.715924
		2021-09-13	12.9227	0.357407	1099.69	2653.92	-278.837		417.508	12.3505	0.385745	0.0137547	-0.134511
		2021-09-13	9.00524	0.0468704	1018.14	3484.96	-287.939		233.616	11.6315	0.234501	0.0242367	-0.931348
		2021-09-13	10.3729	0.049407	401.839	3992.01	-119.076		221.921	6.13523	0.0932802	0.00562172	-0.483635
		2021-09-13	9.50857	0.0666678	394.302	4127.12	-247.547		195.57	5.57528	0.0870871	0.00426739	-0.0555838
		2021-09-13	8.27208	0.0188349	142.864	3100.15	-262.227		227.576	6.2576	0.0425577	0.00292912	-0.0487086
		2021-09-13	3.87074	0.00562762	195.427	1627.83	-422.586		203.756	6.46297	0.111029	0.00945945	-0.191405
		2021-09-13	7.89039	-0.0228628	287.662	3078.42	-503.271		219.144	6.03834	0.0906691	0.00567218	-0.288513
		2021-09-13	14.3566	0.110003	269.226	5310.37	-260.793		229.029	6.10191	0.0465327	0.00245571	-0.229441
		2021-09-13	5.73643	0.00776638	96.0686	1200.29	-335.2		409.027	14.13	0.0729681	0.00912163	-0.274576
		2021-09-13	4.7686	0.0137837	984.753	2459.33	-133.207		165.687	7.22403	0.374503	0.0175591	-0.697526
		2021-10-22	9.7602	0.024883	659.65	3514.75	-2.07758		235.195	10.2093	0.148724	0.0116969	-0.738084
		2021-10-22	18.2536	0.0155748	526.398	7002.96	-3.05845		210.488	5.55717	0.0651261	0.00460232	-0.684342
		2021-10-22	9.83655	0.0336187	111.557	1663.58	-4.69023		469.799	14.4531	0.0612327	0.00590643	-0.0770904
		2021-10-22	14.5559	0.0585384	378.245	5900.14	-4.00152		202.581	5.988	0.057197	0.00196819	0.00656674
		2021-10-22	9.29847	0.0315167	133.869	2544.65	-6.20255		296.745	8.25781	0.0467034	0.00407409	0.0954155
		2021-10-22	11.7634	0.0180171	368.59	7407.15	-3.53333		127.764	3.40185	0.0443337	0.001555	0.0972785
		2021-10-22	14.2914	0.0334758	281.421	5528.99	-5.25593		207.788	5.48941	0.0452301	0.00222523	-0.484995
		2021-10-22	5.49322	0.0120657	125.192	1181.96	-4.21034		391.337	14.73	0.0612043	0.00848621	-0.545713
		2021-10-22	12.7031	0.0227323	122.153	2400.08	-4.74283		428.735	12.0566	0.0439157	0.00417625	-0.332548
		2021-10-22	3.38712	0.0237051	160.252	2235.73	-1.53728		121.783	3.54462	0.0641999	0.00431259	-0.0773008
		2021-10-22	14.8009	0.0190503	370.039	2378.94	-5.19908		504.751	21.5756	0.132313	0.0176296	-0.7927
		2021-10-22	4.67992	0.00878939	149.517	2190.7	-3.93939		174.12	7.03904	0.060691	0.00437731	-0.140979
		2021-10-22	5.1064	0.0233418	137.844	2927.65	-3.0929		139.941	4.03857	0.0423227	0.00300867	0.0358209
		2021-10-22	8.17527	0.00158116	270.386	3124.92	-4.36686		211.632	5.86769	0.0753641	0.00491713	-0.4915
		2021-10-22	19.1177	0.0511561	535.498	10673.6	-6.82497		143.307	3.7345	0.0443794	0.00112967	-0.017672
	Sample 27.31 Area 3	2021-09-13	10.5285	0.0456279	429.118	2203.17	-235.78		420.41	14.3638	0.158491	0.0126956	-0.481521
		2021-09-13	6.61586	0.0441244	191.24	2041.04	-325.221		280.774	12.4683	0.0815207	0.0079506	-0.397166
		2021-09-13	12.3958	0.0350132	346.946	3805.79	-270.553		283.637	8.67299	0.0882598	0.00464207	0.272767
		2021-09-13	8.09015	0.00905763	489.931	3491.94	-271.131		204.895	6.79168	0.108154	0.0116833	-0.851387
		2021-09-13	11.9126	0.0406807	124.46	2681.97	-326.614		405.478	19.6531	0.0441053	0.00398281	0.135753
		2021-09-13	1.43184	-0.0028406	45.5479	594.412	-269.582		209.694	10.0633	0.0660257	0.015681	-0.133701
		2021-09-13	2.34518	0.0168243	88.6606	857.31	-352.245		240.735	9.20553	0.0869945	0.0117202	-0.155791
		2021-09-13	24.8645	0.0573404	407.578	6494.5	-562.713		330.44	9.38555	0.0564152	0.00296549	-0.517263
		2021-09-13	17.1813	0.0666615	171.031	2583.42	-290.946		572.136	16.4889	0.0563567	0.00516801	-0.45142
	Sample 32.65 Area 1	2021-09-14	6.64335	0.0791007	200.783	1845.99	-125.558		285.14	9.488	0.060098	0.00752219
		2021-09-14	6.50141	0.125255	177.385	2361.56	-117.746		210.579	6.37943	0.0530795	0.00459601
		2021-09-14	8.74623	0.0555897	304.862	2561.7	-183.279		260.165	7.36483	0.101461	0.00630449
		2021-09-14	16.3574	0.214013	5989.89	14524.3	175.353		102.609	7.41841	0.313271	0.0234518
		2021-09-14	15.1112	0.13187	454.76	4985.99	-127.045		229.01	6.7233	0.0804567	0.00710487
		2021-09-14	16.266	0.270351	376.642	4173.86	-408.765		294.437	8.15182	0.073734	0.00465822
		2021-09-14	9.49406	0.0818885	376.187	2465.1	-621.421		290.267	8.75234	0.137628	0.0106828
		2021-09-14	8.19287	0.168898	126.097	2292.24	-171.988		267.622	7.69882	0.0511545	0.00504465
		2021-09-14	8.21937	0.113115	649.089	2936.25	-170.117		211.016	6.79578	0.20386	0.00861165
		2021-09-14	8.27983	0.09394	281.384	2612.93	-209.176		238.748	7.02433	0.0991738	0.00593112
		2021-10-21	10.6246	0.169087	137.222	2197.76	-1.46483		341.921	10.09	0.0541833	0.00492661
		2021-10-21	10.8253	0.122427	280.57	3226.65	-1.13968		236.099	6.752	0.0773391	0.00399385
		2021-10-21	15.0419	0.192516	2240.62	5621.31	-1.68051		213.058	11.0992	0.301154	0.0188513
		2021-10-21	10.4883	0.117048	208.944	3484.62	-1.07988		211.572	5.88602	0.054487	0.00282356
		2021-10-21	14.886	0.118593	674.301	5711.89	1.19715		183.052	4.97371	0.107086	0.00304772
		2021-10-21	8.57937	0.0788217	114.795	2286.49	-1.07036		263.249	7.65851	0.0444787	0.00377126
		2021-10-21	11.4105	0.159959	206.354	2689.66	0.328097		299.501	8.55448	0.0677395	0.00419577
		2021-10-21	15.0267	0.200689	165.041	3041.96	-1.98605		347.314	9.57195	0.0490933	0.00274505
		2021-10-21	5.43104	0.118307	7425.91	9378.15	-4.00883		54.9679	3.89719	0.663197	0.0136611
		2021-10-21	7.95638	0.154114	266.945	2207.83	-1.0907		252.036	7.31764	0.10952	0.00665687
		2021-10-21	10.8144	0.137502	230.457	2712.14	-0.78264		279.101	7.74371	0.0776378	0.00459969
		2021-10-21	14.7953	0.377154	273.091	4929.08	-2.09758		210.005	5.67254	0.0503072	0.00225856
		2021-10-21	10.7761	0.364502	240.953	3422.67	-1.11405		226.985	7.45748	0.0620594	0.00345025
		2021-10-21	11.4991	0.120731	367.933	2694.19	-1.87709		302.502	10.0189	0.121299	0.0061578
		2021-10-21	14.0233	0.139717	565.645	3937.43	-1.76088		249.66	6.85305	0.127788	0.00638486
	Sample 32.65 Area 2	2021-09-14	39.4917	0.290879	149531	211921	8400.49		16.4463	1.23035	0.620539	0.0126522		Note: excluded from interpretation due to mixing between calcite and dolomite
		2021-09-14	46.7134	0.680946	20985	48193.2	1037.52		81.8405	4.51113	0.3572	0.0218193		Note: excluded from interpretation due to mixing between calcite and dolomite
		2021-09-14	63.4247	0.500213	275576	359206	15526.4		14.7541	0.834384	0.690643	0.00864858		Note: excluded from interpretation due to mixing between calcite and dolomite
		2021-09-14	33.0637	0.200763	17551.2	56378.3	361.062		43.5377	1.50728	0.280851	0.0151691		Note: excluded from interpretation due to mixing between calcite and dolomite
		2021-09-14	36.7535	0.149943	18539.4	43284.9	756.735		68.1076	2.9665	0.370444	0.0141775		Note: excluded from interpretation due to mixing between calcite and dolomite
		2021-09-14	51.3406	0.282963	33625.7	72827.8	1612.7		55.6808	2.33968	0.406139	0.0135785		Note: excluded from interpretation due to mixing between calcite and dolomite
		2021-09-14	38.5661	0.306322	40413.6	79620.9	2035.62		39.5656	2.2334	0.449598	0.00993456		Note: excluded from interpretation due to mixing between calcite and dolomite
		2021-09-14	53.8775	0.527442	100798	145427	5471.76		29.9496	1.62599	0.622108	0.0101625		Note: excluded from interpretation due to mixing between calcite and dolomite
		2021-09-14	45.717	0.558645	60680.4	124076	3194.55		28.6308	1.39868	0.435059	0.012319		Note: excluded from interpretation due to mixing between calcite and dolomite
		2021-09-14	39.6878	0.171683	13061.7	38853.6	174.113		84.8775	4.95425	0.30595	0.0168786		Note: excluded from interpretation due to mixing between calcite and dolomite
		2021-10-21	29.885	0.440531	32180.9	67458.9	1.11485		31.8773	1.12693	0.417782	0.00975306		Note: excluded from interpretation due to mixing between calcite and dolomite
		2021-10-21	38.5758	0.478126	7133.96	39018.3	-0.584509		69.6758	3.07849	0.164765	0.00519335		Note: excluded from interpretation due to mixing between calcite and dolomite
		2021-10-21	33.0721	0.263579	105233	142824	6.29064		19.1642	1.15443	0.632781	0.0105813		Note: excluded from interpretation due to mixing between calcite and dolomite
		2021-10-21	38.5926	0.29575	20513.6	38251.8	0.387265		83.2689	4.58675	0.433937	0.0157278		Note: excluded from interpretation due to mixing between calcite and dolomite
		2021-10-21	25.0288	0.24824	13997.3	46227.1	0.104304		40.0452	1.57279	0.263612	0.00880485		Note: excluded from interpretation due to mixing between calcite and dolomite
		2021-10-21	22.7243	0.181381	66481.1	94878.4	5.85027		28.003	2.88582	0.571509	0.0152999		Note: excluded from interpretation due to mixing between calcite and dolomite
Host rock	Sample 27.31 Area 3	2021-10-22	16.087	0.623352	177418	272666	49.8931		4.74195	0.171495	0.567085	0.00749669	-0.463385
		2021-10-22	13.8948	0.550393	326963	467980	94.2029		2.85608	0.159466	0.601657	0.00801954	-0.904822
		2021-10-22	11.3323	0.452062	68398.5	131728	16.4403		7.16661	0.257499	0.450174	0.00751267	-0.807643
		2021-10-22	11.664	0.393702	121520	195757	36.895		4.95473	0.186527	0.541875	0.00810789	-0.908689
		2021-10-22	18.473	0.658037	533564	703577	165.312		2.26853	0.15839	0.670078	0.00702673	-0.512102
		2021-10-22	11.8356	0.419673	181773	273925	52.2197		3.71716	0.160257	0.581167	0.00741375	-0.681704
		2021-10-22	9.95791	0.338123	515472	602552	169.995		2.57352	0.369052	0.696767	0.0195189	-0.992254
		2021-10-22	12.0585	0.425912	183187	272056	57.5176		4.42817	0.287471	0.568526	0.0110858	-0.942861
		2021-10-22	11.0762	0.446454	118007	188780	32.7454		5.40705	0.270896	0.527906	0.00999385	-0.958446
		2021-10-22	11.3437	0.385818	42337.8	98304.4	6.87756		9.39728	0.314277	0.375628	0.00753704	-0.912102
		2021-10-22	11.3544	0.342759	125358	202447	37.8985		4.94112	0.252091	0.533975	0.00921034	-0.924369
		2021-10-22	12.7104	0.47745	96703.9	162518	27.4746		6.9709	0.352269	0.499507	0.0123735	-0.947783
		2021-10-22	13.499	0.459086	97441.8	174218	26.786		6.66559	0.299198	0.485414	0.00805741	-0.80479
		2021-10-22	10.8727	0.37264	78434.3	143354	26.4941		6.78059	0.352955	0.469367	0.0114163	-0.944379
		2021-10-22	11.2854	0.352728	43289.5	97161.3	12.4557		9.5148	0.380205	0.38972	0.0105822	-0.935357
		2021-10-22	11.9539	0.399856	283278	396197	90.1902		2.48906	0.0993948	0.632228	0.00681724	-0.84395
		2021-10-22	11.138	0.410368	90535.3	159701	26.4043		5.55013	0.182062	0.506271	0.00673624	-0.743907
		2021-10-22	12.5122	0.519062	133868	211054	37.6204		5.83977	0.33492	0.521632	0.0117036	-0.903674
		2021-09-13	11.4949	0.481171	96120.4	165588	5417.18		6.24581	0.301245	0.524442	0.00934104	-0.941242
		2021-09-13	8.22855	0.439234	94183.7	136119	5262.73		8.76414	0.861052	0.486605	0.0338658	-0.98694
		2021-09-13	10.679	0.368705	78417.3	137313	4587.62		7.22852	0.34208	0.514795	0.00824724	-0.849449
		2021-09-13	9.38599	0.278341	33054.8	78637	1898.61		10.9463	0.536872	0.367854	0.014952	-0.970546
		2021-09-13	10.5452	0.325	43769	98429.2	2275.75		9.80234	0.425011	0.391548	0.0129603	-0.935305
		2021-09-13	11.9407	0.390396	339641	470212	18429.6		2.25069	0.0917251	0.662464	0.00720876	-0.875002
		2021-09-13	8.53035	0.281619	61467.5	108306	3601.2		7.01695	0.312814	0.521169	0.00995377	-0.833088
		2021-09-13	11.0744	0.324924	65784.5	122692	3428.56		9.36093	0.563322	0.438897	0.0172395	-0.985304
		2021-09-13	10.8924	0.397561	128735	200509	7016.24		4.93412	0.215492	0.58252	0.00834241	-0.915583
	Sample 16.50 Area 1	2021-09-14	54.7395	9.64209	284099	438910	17113		10.5903	1.08887	0.587718	0.00913277
		2021-09-14	70.3262	8.28401	236850	401274	14223.9		13.5406	0.430588	0.549257	0.00864273
		2021-09-14	58.4046	9.1078	837598	1.36591e+06	48302.6		3.37566	0.128138	0.55543	0.00678612
		2021-09-14	100.998	8.64981	1.50949e+06	2.11183e+06	86859.1		3.63543	0.117803	0.652153	0.00662946
		2021-09-14	105.206	13.4867	661237	975915	38631.8		8.34132	0.249961	0.616512	0.00761458
		2021-09-14	76.3378	11.8851	219365	546803	11969.3		10.9875	0.396704	0.363605	0.0115083
		2021-09-14	62.1054	7.69531	211850	412375	11709.6		11.5321	0.323704	0.466381	0.00729602
		2021-09-14	158.104	14.2171	1.6415e+06	2.42126e+06	96510.7		4.955	0.257852	0.617773	0.00825683
		2021-09-14	94.4402	13.571	838923	1.35285e+06	50544.3		5.76942	0.307685	0.559799	0.007799
		2021-09-14	46.7728	7.66526	276321	472795	15334		8.02317	0.367805	0.526031	0.00925525
		2021-09-14	60.8661	11.7941	306304	630635	16995.3		7.70984	0.298254	0.435015	0.00780018
		2021-09-14	58.9129	10.1622	610014	974898	33797.3		4.66575	0.184866	0.563912	0.00817829
		2021-09-14	74.9557	10.311	322141	522815	18888.1		11.2385	0.405929	0.566296	0.00730121
		2021-09-14	69.5914	7.39844	1.27904e+06	1.61535e+06	73989.3		3.35458	0.116207	0.724602	0.00743216
		2021-09-14	97.3008	10.8666	1.26421e+06	1.64305e+06	74135.2		4.72207	0.261181	0.69782	0.00970641
		2021-09-14	97.836	25.2262	740670	1.17006e+06	44049		6.61154	0.294719	0.573108	0.00801595
		2021-09-14	90.0568	19.8181	1.02015e+06	1.62793e+06	59135.2		4.29035	0.152592	0.569928	0.00808128
		2021-09-14	137.305	10.6343	616513	940326	34697.1		11.7973	0.508344	0.596537	0.00671492
		2021-10-22	42.3741	8.0965	188813	430900	57.8616		8.46794	0.306441	0.387254	0.00798982
		2021-10-22	75.2884	11.5752	814639	1.28621e+06	303.83		4.65654	0.147511	0.560688	0.00619464
		2021-10-22	92.1691	14.3767	825263	1.52932e+06	262.449		4.88045	0.183822	0.474796	0.00657396
		2021-10-22	59.6744	8.40147	609170	938605	200.876		5.20265	0.180789	0.568526	0.00743558
		2021-10-22	135.731	10.9438	2.58846e+06	3.45517e+06	891.415		3.15923	0.107156	0.664252	0.00683089
		2021-10-22	35.336	7.56947	472996	630723	141.157		4.95816	0.275303	0.642811	0.011154
		2021-10-22	68.7493	11.0564	544039	901458	182.275		6.38515	0.33457	0.522826	0.0124954
		2021-10-22	65.5313	7.62196	1.15398e+06	1.61092e+06	392.911		3.43839	0.139473	0.630332	0.00741726
		2021-10-22	77.0563	10.7356	769352	1.11689e+06	257.627		5.60226	0.1952	0.607033	0.00720034
	Sample 16.50 Area 2	2021-09-14	27.5902	5.5267	83771.3	199665	4818.43		11.2041	0.450515	0.354212	0.0149204
		2021-09-14	40.01	4.76115	61743.2	231947	2417.5		13.1962	0.386049	0.236382	0.00640574
		2021-09-14	34.7122	4.72657	110517	255313	6003.38		10.5358	0.492022	0.387544	0.0125579
		2021-09-14	42.7076	7.78436	533047	702845	30817.2		5.93498	0.537642	0.6711	0.0142634
		2021-09-14	35.483	6.21254	98480.4	244263	5227.61		11.4724	0.460982	0.356729	0.010917
		2021-09-14	44.9602	6.26907	83821.4	276381	4089.91		12.5214	0.41114	0.273135	0.00758749
		2021-09-14	45.1579	6.38319	120997	258170	6751.16		13.2934	0.451983	0.424103	0.0102211
		2021-09-14	30.4087	3.98127	92603.9	237639	4271.78		9.66522	0.273684	0.355711	0.00522388
		2021-09-14	30.6431	5.74202	89437.1	223636	4841.43		10.6287	0.46618	0.353625	0.013476
		2021-09-14	31.4959	6.65271	87169.6	224609	4324.39		10.5614	0.306875	0.352792	0.00596772
		2021-09-14	47.3383	6.69155	143043	284030	7908.13		12.9488	0.454265	0.445929	0.0094116
		2021-09-14	23.2804	7.68806	108227	215361	5675.29		9.65637	0.763979	0.416028	0.0167269
		2021-09-14	31.9218	4.49596	54358.1	185035	2439.64		12.9866	0.385913	0.265676	0.00707045
		2021-09-14	44.2985	4.9144	48375.1	217883	2566.72		15.1876	0.423044	0.204558	0.00443028
		2021-09-14	34.9027	4.59859	119243	274634	6544.89		10.9793	0.584777	0.368198	0.0124251
		2021-09-14	39.6496	5.13646	98719	247086	4928.38		12.9883	0.583651	0.333749	0.0149808
		2021-09-14	40.5224	5.43678	91695	268017	4596.15		11.4447	0.369715	0.304504	0.0084031
		2021-09-14	38.8769	5.03276	191285	418905	10078.1		7.68585	0.458013	0.395149	0.0143363
		2021-09-14	50.9602	6.07094	71171.6	273556	3392.31		13.808	0.443776	0.235629	0.0082673
		2021-09-14	35.7168	5.28028	56996.8	208148	2087.11		12.5465	0.427813	0.249906	0.00789278
		2021-10-22	23.3556	8.57459	353976	472567	95.747		4.65479	0.236741	0.638744	0.00974699
		2021-10-22	57.5841	9.60088	497941	643065	171.185		7.11989	0.257819	0.687201	0.00744886
		2021-10-22	33.5531	12.303	723868	1.07597e+06	247.004		2.62108	0.109727	0.589928	0.00798476
		2021-10-22	25.1438	4.8003	134086	272503	28.9794		8.62294	0.423404	0.388258	0.0150793
		2021-10-22	28.7002	7.94567	229052	393388	62.0395		5.76887	0.255743	0.506781	0.00722288
		2021-10-22	33.4419	6.10086	330110	544455	90.0083		5.98382	0.403729	0.496588	0.0130245
		2021-10-22	43.2179	5.61241	544559	815731	165.808		4.24298	0.311092	0.59996	0.012029
		2021-10-22	25.0723	3.52141	68785.4	188194	9.24078		10.8692	0.444746	0.309622	0.0118159
		2021-10-22	31.1151	7.23524	226901	446474	59.5748		6.64172	0.3539	0.422598	0.00824506
		2021-10-22	10.9507	4.47246	483918	578120	169.604		1.81662	0.150068	0.714093	0.0127771
	Sample 32.65 Area 1	2021-09-14	26.8568	0.312778	43640.6	135163	2463.71		14.9642	0.430417	0.295038	0.0073385
		2021-09-14	20.441	0.512681	826128	1.02115e+06	47207.6		1.64954	0.0956439	0.733918	0.00806692
		2021-09-14	17.7555	0.369272	244225	339516	13858.1		4.30562	0.27115	0.643225	0.011293
		2021-09-14	18.2232	0.277027	169120	253273	9812.02		5.96947	0.343796	0.593212	0.0112567
		2021-09-14	19.2457	0.675642	608511	778608	36501.6		2.23356	0.119626	0.704404	0.00774483
		2021-09-14	17.321	0.425053	131787	200315	7703.89		6.47203	0.166974	0.600947	0.00634819
		2021-09-14	19.7688	0.244571	35900.4	109974	1838.8		14.0707	0.542872	0.277485	0.0136495
		2021-09-14	27.5836	0.26412	25470	121966	931.555		17.0078	0.481734	0.186861	0.00702811
		2021-09-14	15.8454	0.284813	224576	320127	12676.2		4.16424	0.206343	0.623385	0.00962182
		2021-09-14	11.0248	0.589517	415105	494264	24413.9		1.96712	0.171071	0.75134	0.0120786
		2021-10-21	26.6533	0.492475	118838	216014	19.1092		8.93991	0.436154	0.483007	0.0103041
		2021-10-21	22.9789	0.241893	23292.5	101141	4.72792		16.0902	0.473311	0.200093	0.00815867
		2021-10-21	15.3759	0.353059	161052	215093	27.3492		6.30928	0.434069	0.625114	0.0159715
		2021-10-21	14.3501	0.254237	125572	192334	15.1725		5.75454	0.305453	0.565875	0.0124353
		2021-10-21	13.2395	0.274257	131471	198070	16.2302		5.83542	0.396637	0.567344	0.0152141
		2021-10-21	6.38568	0.696798	497088	550232	73.5106		1.7843	0.207673	0.759985	0.0135168
		2021-10-21	17.6315	0.307795	103207	175093	11.0813		7.21918	0.263379	0.522261	0.00886205
		2021-10-21	14.9061	0.314323	308169	392494	38.106		2.73517	0.104564	0.695187	0.00813675
		2021-10-21	22.8588	0.281901	90290.3	184787	4.37369		9.3585	0.434693	0.414832	0.0132436
		2021-10-21	17.9574	0.346119	128358	205903	17.6916		6.40086	0.267644	0.551745	0.00855685
		2021-10-21	19.2604	0.25626	19518	84858.9	-1.0186		15.9858	0.478026	0.203601	0.00748111
		2021-10-21	22.5158	0.223103	12663.3	90114.4	-0.715993		17.512	0.465915	0.126301	0.00314665
		2021-10-21	18.6084	0.317192	53279.8	119495	3.52501		11.0814	0.461956	0.386605	0.0116768
		2021-10-21	20.8546	0.256324	66559.4	150752	4.06743		10.4136	0.406098	0.390092	0.0117248
		2021-10-21	20.7859	0.242273	50091.5	127842	4.88808		11.9713	0.487169	0.335017	0.0139093
	Sample 32.65 Area 2	2021-09-14	15.5551	0.372138	154030	233792	8554.61		5.28683	0.264907	0.590606	0.0101735
		2021-09-14	17.7339	0.286516	266421	374224	15262.1		3.86961	0.212028	0.642418	0.00877028
		2021-09-14	26.2294	3.74946	199202	310822	10663.8		6.61469	0.382828	0.582849	0.0101189
		2021-09-14	10.5073	0.59913	872956	1.02767e+06	51057.2		0.779441	0.0273537	0.772207	0.00875337
		2021-09-14	9.52023	0.636117	395721	459035	22642.8		1.86287	0.153082	0.767483	0.0120261
		2021-09-14	9.19595	0.796275	536177	606727	31657.5		1.59869	0.145753	0.77969	0.0117934
		2021-09-14	16.8581	0.559814	415013	522977	23663.3		2.51638	0.122975	0.71691	0.00938147
		2021-10-21	12.4502	0.385813	197434	259093	33.1358		3.43626	0.109042	0.682845	0.00776023
		2021-10-21	11.9526	0.253675	451013	566437	69.2597		1.69738	0.0988821	0.712989	0.00786683
		2021-10-21	14.589	0.299406	142528	214245	13.125		4.92149	0.193296	0.591554	0.00827724
		2021-10-21	11.2104	0.366864	241985	304365	33.9968		3.02959	0.20636	0.694569	0.0111658
		2021-10-21	9.98791	0.391976	334720	405475	41.7531		2.06919	0.130011	0.72147	0.0107025
		2021-10-21	11.5313	0.375364	230036	290070	25.5792		3.09132	0.150874	0.690889	0.0110863
		2021-10-21	17.6484	0.285564	234887	326689	32.6363		3.95828	0.198583	0.638213	0.0088847
		2021-10-21	21.93	0.474912	907105	1.09669e+06	119.529		1.51737	0.0835414	0.747035	0.00780943
		2021-10-21	12.9735	0.542903	727342	851651	93.5724		1.22717	0.0904935	0.759346	0.00846075
		2021-10-21	21.4217	0.381609	68146.6	142618	6.37154		10.6787	0.428832	0.418942	0.01172
		2021-10-21	17.0634	0.384203	522730	639300	63.839		2.11531	0.126837	0.72959	0.00780666

## Sheet: G50244
Hodgskiss, M.S.W., et al., 2022, Time constraints on hydrocarbon migration and caprock formation recorded by calcite spar in a Carboniferous–Permian carbonate-evaporite succession, Finnmark Platform, Barents Sea: Geology, v. 50, https://doi.org/10.1130/G50244.1
